# Supplementary material
Source: PubMed Central journal article supplement (PMC3376857)
Supplement: emmm0004-0298-SD1.pdf [file emmm0004-0298-SD1.pdf]

Manuscript EMM-2010-00803

## **A Small Molecule Inauhzin Inhibits SIRT1 Activity and Suppresses Tumor Growth through Activation of p53**

Qi Zhang, Shelya X. Zeng, Yu Zhang, Yiwei Zhang, Derong Ding, Qizhuang Ye, Samy O. Meroueh, and Hua Lu

*Corresponding author: Hua Lu, Department of Biochemistry & Molecular Biology and Cancer Center, Tulane University School of Medicine*

---

### **Review timeline:**

Submission date:

15 July 2011

Acceptance date:

22 December 2011

---

### **Transaction Report:**

No Peer Review Process File is available with this article, as the authors have chosen not to make the review process public in this case.
